# Supplementary material for: Electrospun three-dimensional V4Nb18O55 nanofibers for advanced lithium uptake
Source: Royal Society of Chemistry journal article supplement (doi:10.1039/c9se00135b), 2019-01-01
Supplement: c9se00135b1.pdf [file c9se00135b1.pdf]

## Supporting Information

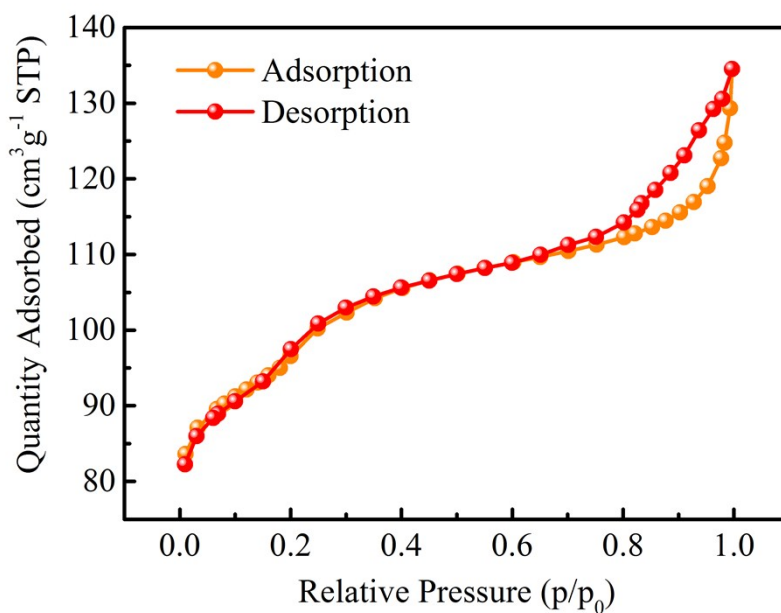

**Fig. S1.** Isotherm linear plots of Brunauer-Emmett-Teller (BET) surface area test of  $V_4Nb_{18}O_{55}$  nanofibers.
